# Supplementary material
Source: publisher figshare collection journal article supplement (https://acs.figshare.com/ndownloader/files/20183261)
Supplement: Supplementary file 1 [file 20183261]

Supporting Information

**A multicolor immunosensor for sensitive visual detection of breast cancer biomarker based on sensitive NADH-ascorbic acid-mediated growth of gold nanobipyramids**

Zongwen Wang<sup>†,‡</sup>, Qian Chen<sup>†</sup>, Yingying Zhong<sup>†</sup>, Xinhui Yu<sup>†</sup>, Yongning Wu<sup>§</sup> and  
FengFu Fu<sup>†\*</sup>

<sup>†</sup>Key Laboratory for Analytical Science of Food Safety and Biology of MOE, Fujian Provincial Key Lab of Analysis and Detection for Food Safety, College of Chemistry, Fuzhou University, Fuzhou, Fujian 350116, China.

<sup>‡</sup>State Key Laboratory of Ecological Pest Control for Fujian and Taiwan Crops, College of Plant Protection, Fujian Agriculture and Forestry University, Fuzhou 350002, China

<sup>§</sup>China National Center for Food Safety Risk Assessment, Beijing 100022, China

---

\* Corresponding author. Tel./Fax: +86-591-22866135; E-mail address: [fengfu@fzu.edu.cn](mailto:fengfu@fzu.edu.cn) (F.-F. Fu)

## **1. Separation and detection of AAP and AA with HPLC**

An Agilent 1100 series high performance liquid chromatography (HPLC) together with a ZORBAX SB-C18 column (4.6 × 250 mm, 5-μm particle size) was employed to achieve the separation and detection of AAP and AA at a flow rate of 1 mL/min. The mobile phase consisted of methanol and KH<sub>2</sub>PO<sub>4</sub> (20 mM, pH=3) with a volume ratio of 1:9. The sample injection volume was 10 μL. The column temperature was set at 30 °C. The wavelength of the UV-Vis detector was set at 250 nm. The ALP hydrolysis solution was diluted 50-fold with the mobile phase before HPLC-MS/MS detection.

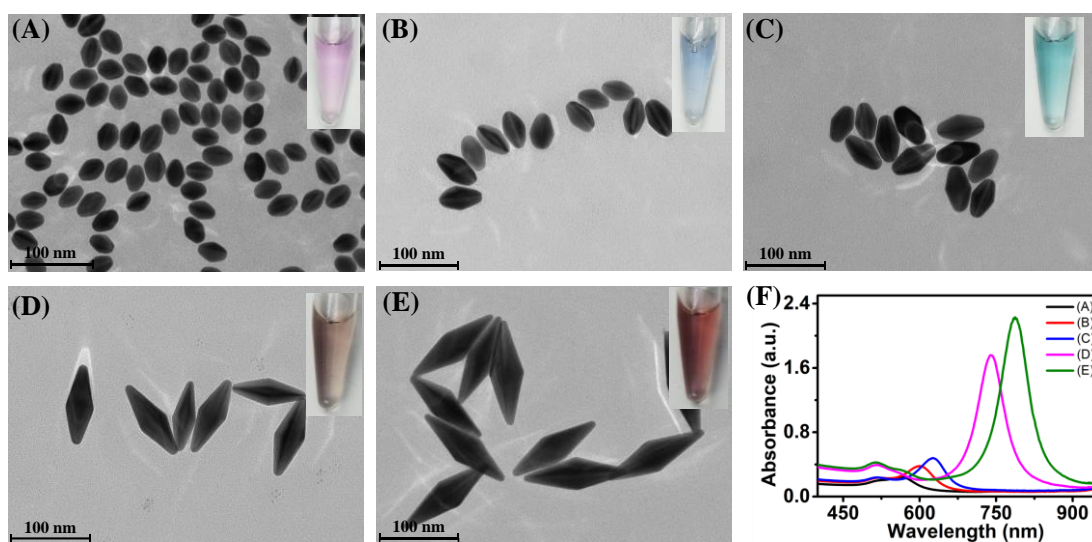

**Figure S1:** TEM images and photographs of the AuNBPs solution (A-E) prepared with only AA reduction (without NADH assistance) and their corresponding UV-visible spectra (F). AA concentration: 560  $\mu\text{M}$  (A), 580  $\mu\text{M}$  (B), 600  $\mu\text{M}$  (C), 670  $\mu\text{M}$  (D) and 750  $\mu\text{M}$  (E).

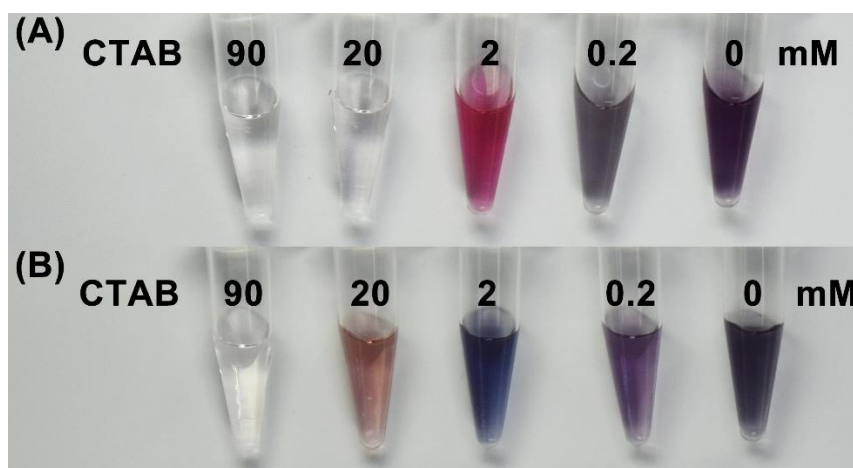

Figure S2: The effect of CTAB on the AuNBPs growth mediated with NADH reduction in the presence (A) and absence (B) of 25 mM HCl. (A): NADH-mediated AuNBPs growth was carried out in 130  $\mu$ L of growth solution containing 0.48 mM HAuCl<sub>4</sub>, 0.96 mM AgNO<sub>3</sub>, 1.25  $\mu$ L seed solution, 25 mM HCl and different concentrations of CTAB; (B): NADH-mediated AuNBPs growth was carried out in 130  $\mu$ L of growth solution containing 0.48 mM HAuCl<sub>4</sub>, 0.96 mM AgNO<sub>3</sub>, 1.25  $\mu$ L seed solution and different concentrations of CTAB.

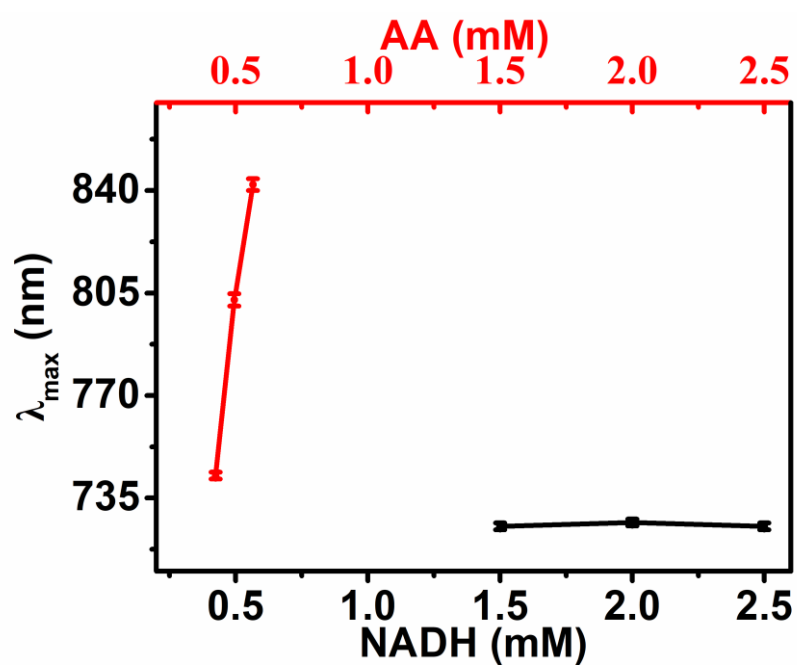

Figure S3: Effect of AA concentration and NADH concentration on the maximum absorption wavelength of longitudinal LSPR of NADH-assisted AA-mediated AuNBPs.

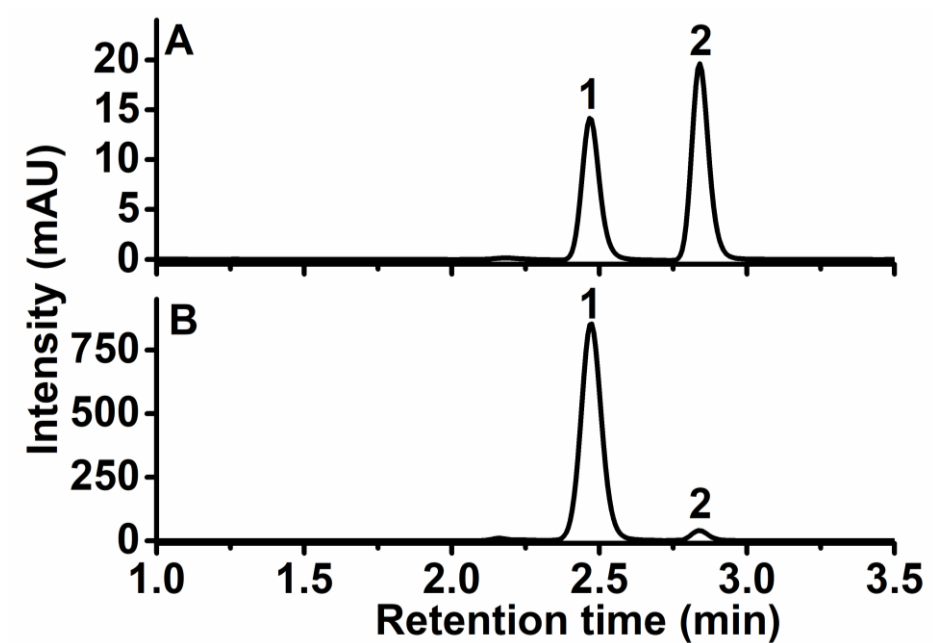

Figure S4: (A): HPLC chromatogram of AAP and AA standard; (B): HPLC chromatogram of AAP solution catalyzed for 1 hour by ALP. Peak 1 and Peak 2 represent AAP and AA, respectively. The concentration of AAP and AA standard was all 20  $\mu$ M.

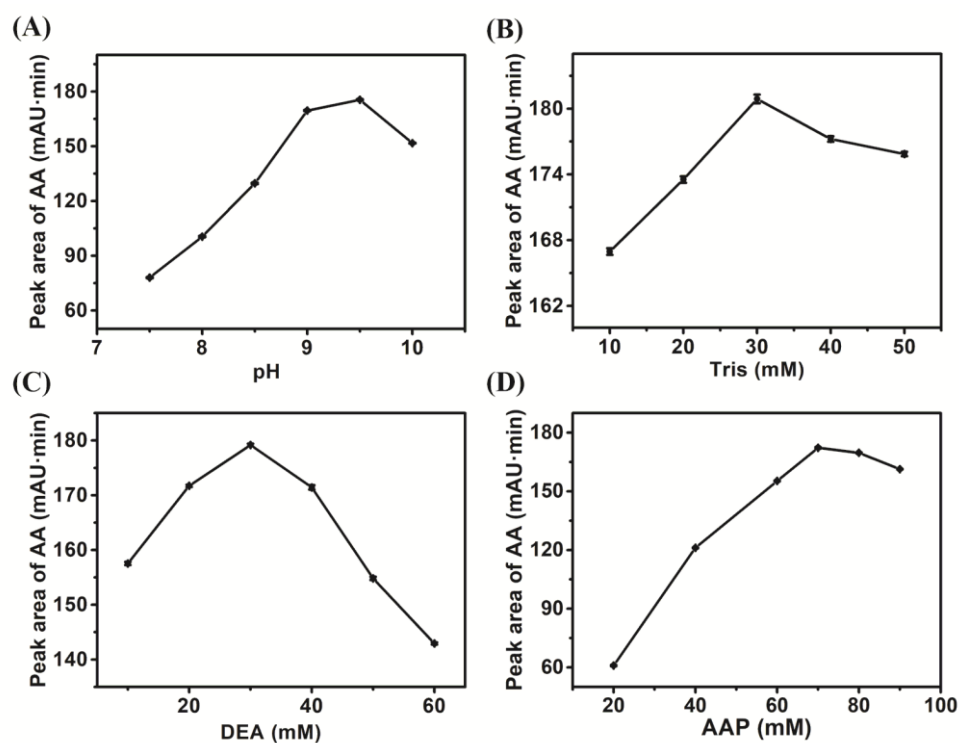

Figure S5: Effect of pH (A) and concentration (B) of Tris-HCl buffer, DEA concentration (C) and AAP concentration (D) on the peak area of AA generated from AAP, which was hydrolyzed by ALP (8 mU/mL) for 1 hour.

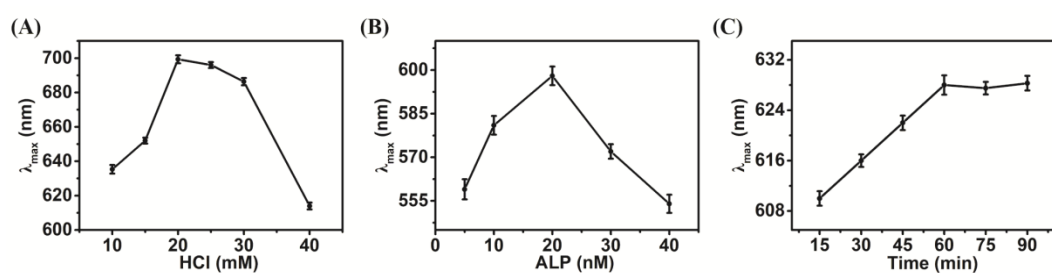

Figure S6: Effects of HCl concentration in Au NBPs growth solution (A), streptavidin-linked ALP concentration (B) and incubation time of streptavidin-linked ALP (C) on the maximum absorption wavelength of longitudinal LSPR of NADH-assisted AA-mediated AuNBPs.



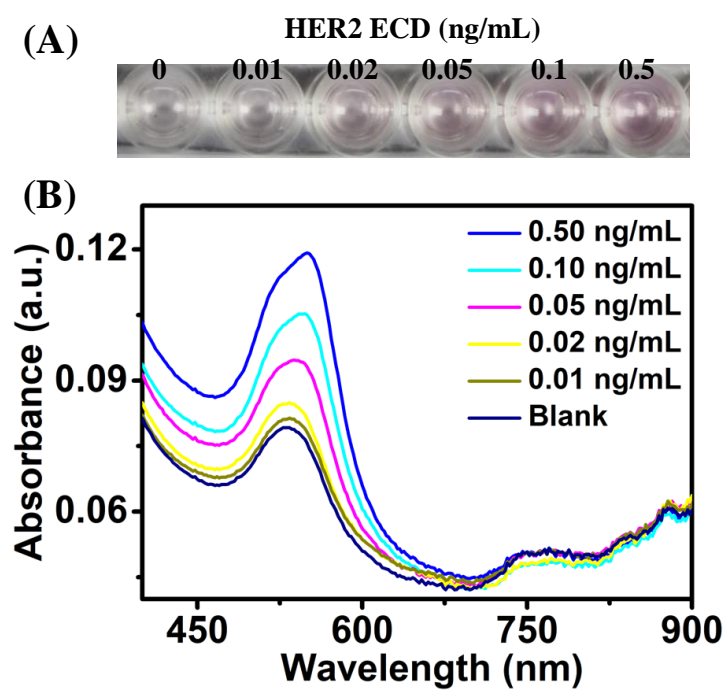

Figure S7: The photographs (A) and the UV-visible adsorption spectra (B) of the multicolor immunosensor for detecting low concentrations of HER2 ECD (0 - 0.5 ng/mL).

Table S1: Comparison of analytical performance among the previous methods and our multicolor immunosensor for HER2 ECD detection

| Analytical methods      | Recognition element | Liner range (ng/mL) | Detection limit (ng/mL)                                           | Reference |
|-------------------------|---------------------|---------------------|-------------------------------------------------------------------|-----------|
| Fluorescence            | Antibody            | 0.025-5             | 0.025                                                             | 1         |
| Fluorescence            | Aptamer             | 6250-31250          | 4750                                                              | 2         |
| Electrochemistry        | Aptamer             | 0.2-2               | 0.2                                                               | 3         |
| Electrochemistry        | Antibody            | 15-100              | 4.4                                                               | 4         |
| Electrochemistry        | Affibody            | 0-40                | 6                                                                 | 5         |
| Electrochemistry        | Imprinted polymer   | 10-70               | 1.6                                                               | 6         |
| Colorimetry             | Antibody            | 2.5-100             | 1.5                                                               | 7         |
| Multicolor immunosensor | Antibody            | 1.0-7.0             | 0.05 (UV-visible spectrophotometry)<br>0.5 (bare eye observation) | This work |

1. Niazi, J. H.; Verma, S. K.; Niazi, S.; Qureshi, A. *Analyst* **2015**, 140, 243-249.
2. Marques, R. C.; Viswanathan, S.; Nouws, H. P.; Delerue-Matos, C.; González-García, M. B. *Talanta* **2014**, 129, 594-599.
3. Arya, S. K.; Zhuravski, P.; Jolly, P.; Batistuti, M. R.; Mulato, M.; Estrela, P. *Biosens. Bioelectron.* **2018**, 102, 106-112.
4. Ravalli, A.; da Rocha, C. G.; Yamanaka, H.; Marrazza, G. *Bioelectrochemistry* **2015**, 106, 268-275.
5. Pacheco, J. G.; Rebelo, P.; Freitas, M.; Nouws, H. P. *Sens. Actuators, B* **2018**, 273, 1008-1014.
6. Qureshi, A.; Gurbuz, Y.; Niazi, J. H. *Sens. Actuators, B* **2015**, 220, 1145-1151.
7. Kim, M. I.; Ye, Y.; Woo, M. A.; Lee, J.; Park, H. G. *Adv. Healthcare Mater.* **2014**, 3, 36-41.
